# Supplementary material for: SH3BP4 Regulates Intestinal Stem Cells and Tumorigenesis by Modulating β-Catenin Nuclear Localization
Source: PubMed Central journal article supplement (PMC6391711; doi:10.1016/j.celrep.2019.01.110), 2019-02-26
Supplement: mmc1.pdf [file mmc1.pdf]

**Cell Reports, Volume 26**

**Supplemental Information**

**SH3BP4 Regulates Intestinal Stem Cells  
and Tumorigenesis by Modulating  
 $\beta$ -Catenin Nuclear Localization**

**Pedro Antas, Laura Novellademunt, Anna Kucharska, Isobel Massie, Joana Carvalho, Dahmane Oukrif, Emma Nye, Marco Novelli, and Vivian S.W. Li**

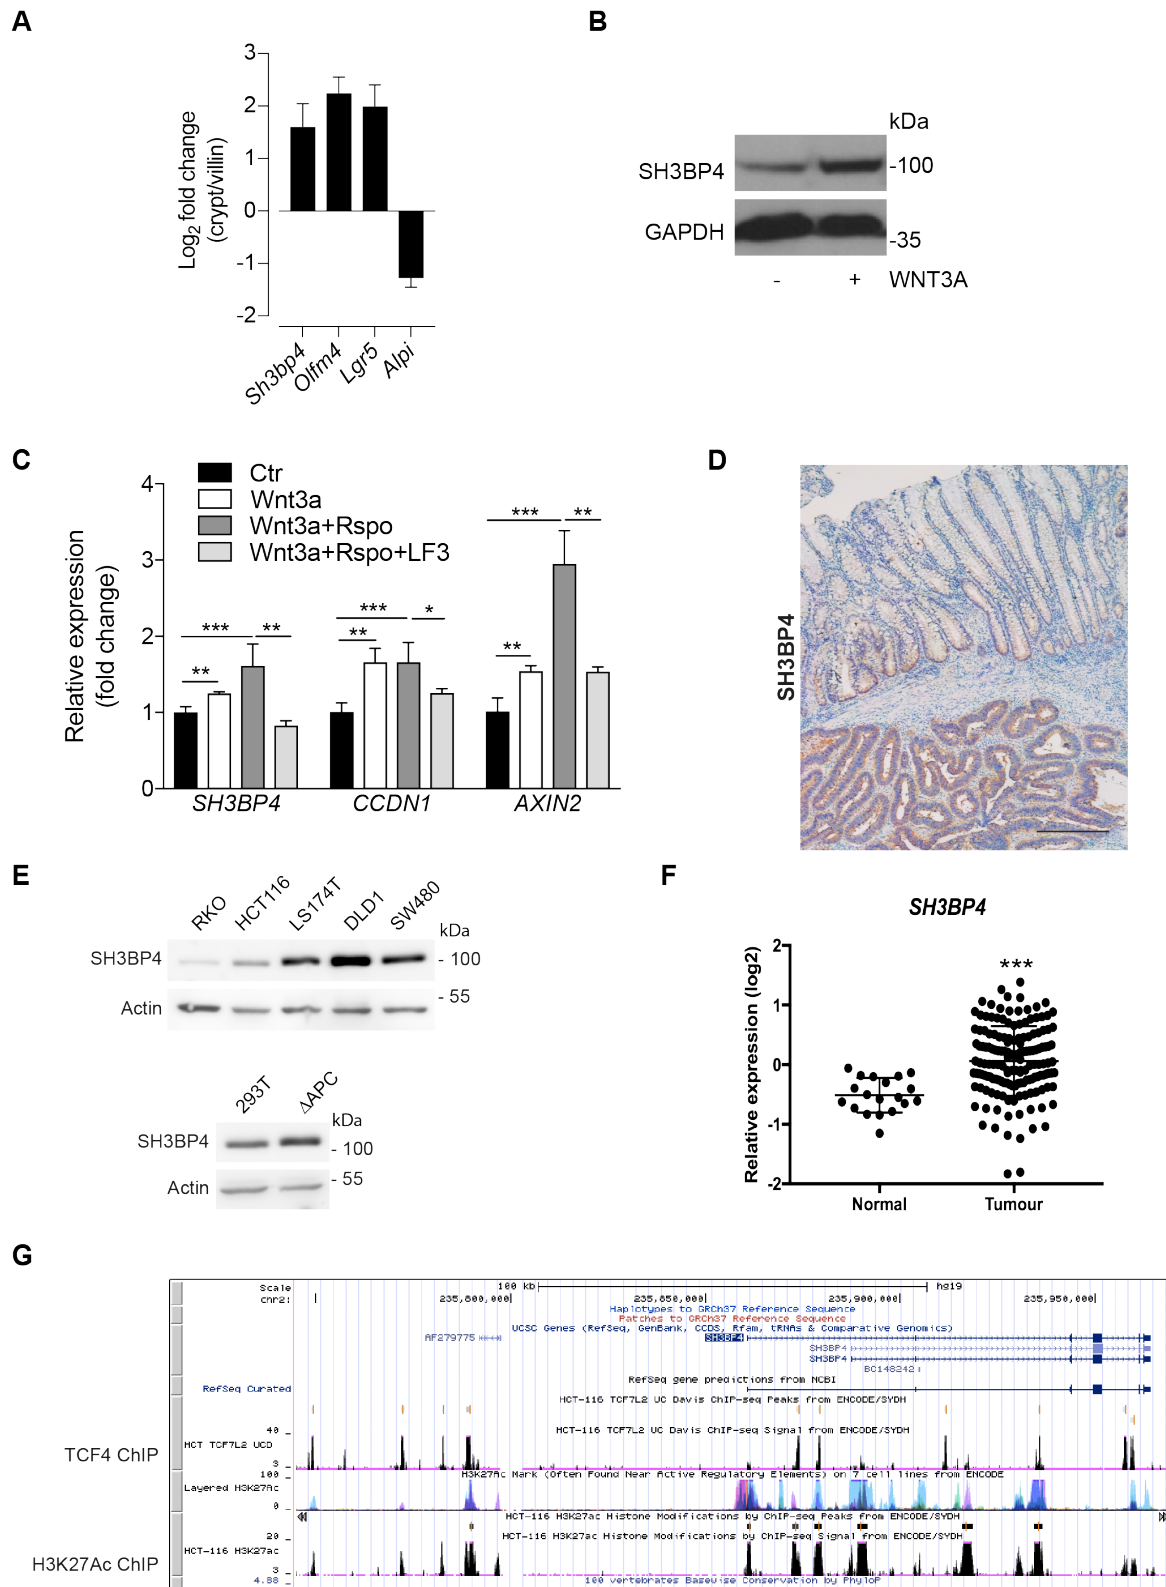

**Figure S1. SH3BP4 is expressed at the crypt and is modulated by Wnt, Related to Figure 1.**

(A) RT-qPCR analysis of the indicated genes in crypt versus villus fractions. Data represent average  $\pm$ SD from 3 independent experiments. (B) Western blot analysis of SH3BP4 protein levels in HEK293T cells stimulated with WNT3A condition media for 16hr (n=3). (C) RT-qPCR of *SH3BP4* and Wnt target genes *AXIN2*, *CCND1* in the indicated treatment conditions (16hr). Expression data are presented as fold induction  $\pm$ SD normalised to  $\beta$ -actin (n=3). (D) Representative immunohistochemistry staining of SH3BP4 in human CRC tissue. Scale bar, 100  $\mu$ m. (E) Western blot analysis showing SH3BP4 expression in different colorectal cancer cell lines (upper), and in HEK293T and  $\Delta$ APC cells (APC4 cells from (Novellasedmunt et al., 2017)) (n=3). (F) mRNA expression analysis of SH3BP4 in 173 CRC patients (data obtained from the Cancer Genome Atlas) (TCGA, 2012). (G) TCF4-binding sites are found upstream and throughout the *SH3BP4* gene locus, and are co-localized with the H3K27Ac peaks. Data obtained from ENCODE where TCF4 ChIP-seq was performed in HCT116 cells (GSM782123) (Consortium, 2012).

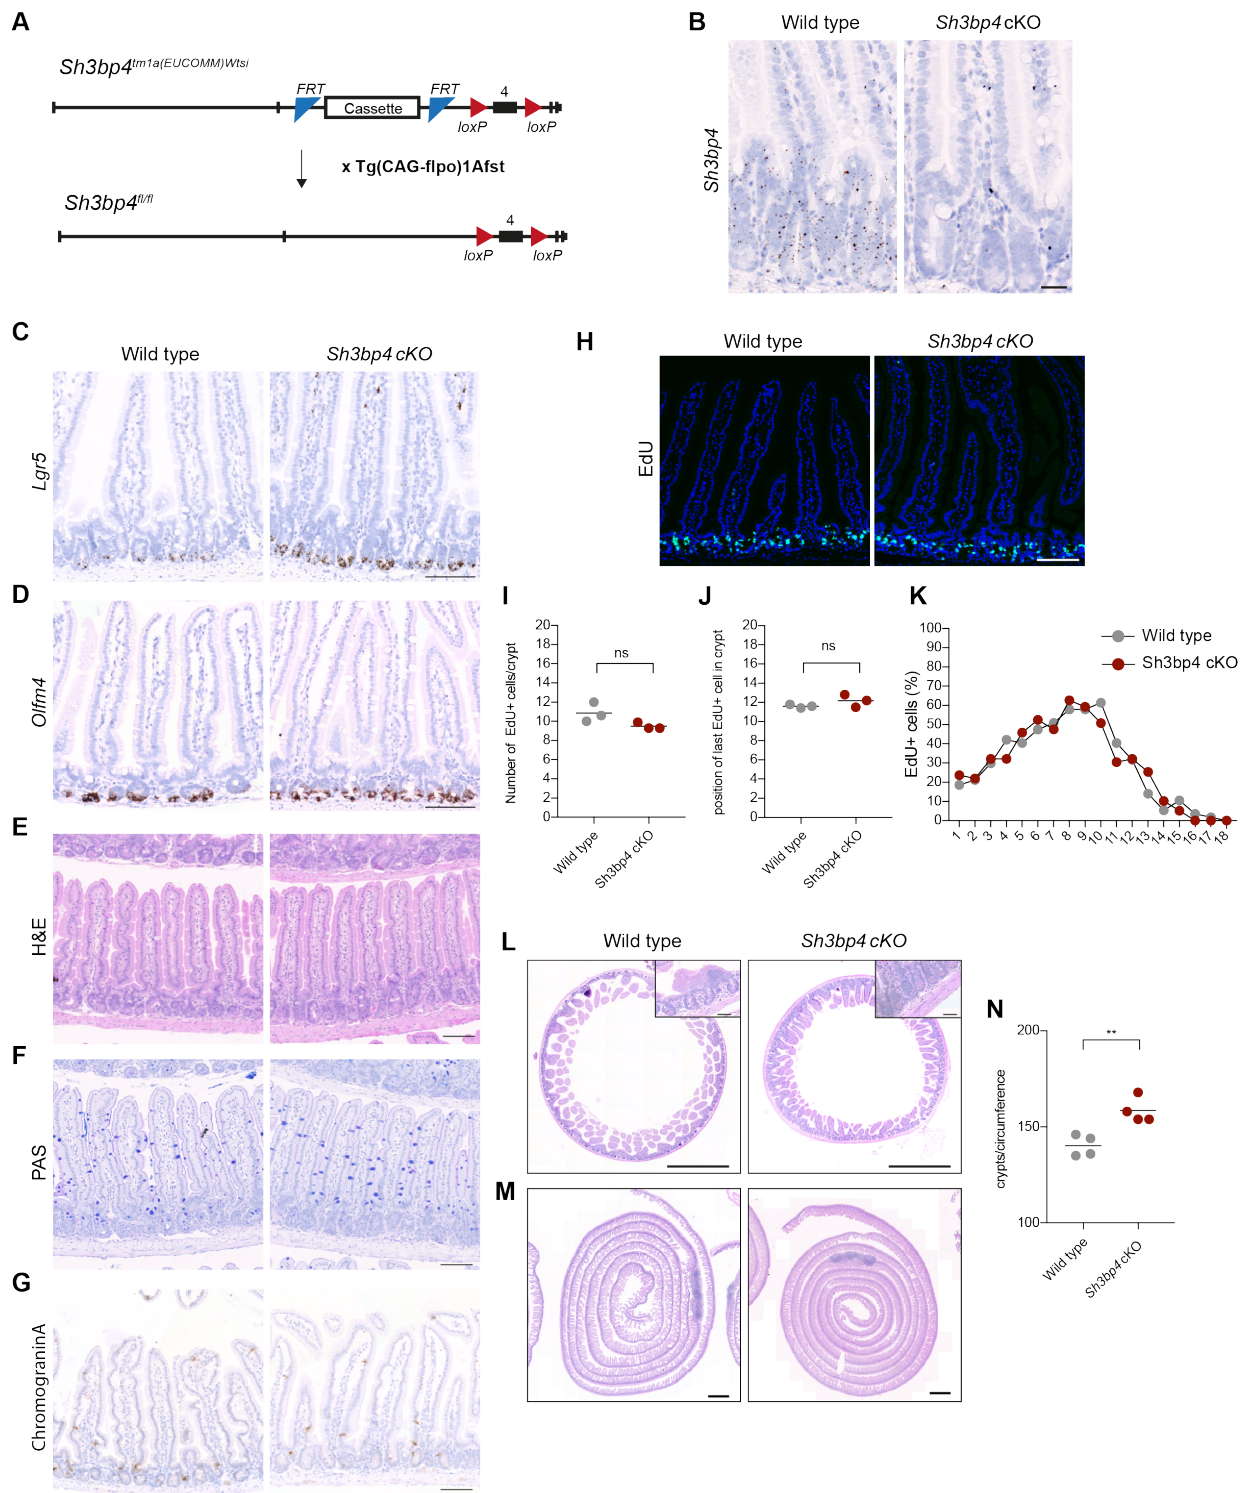

**Figure S2. Characterization of *Sh3bp4* cKO intestine 3 months (A-B) or 25 days (C-K) after deletion, Related to Figure 2.** (A) Schematic overview of *Sh3bp4* targeting strategy. *Sh3bp4*<sup>tm1a(EUCOMM)Wtsi</sup> mouse was first crossed to Tg(CAG-Flpo)1Afst strain to remove the lacZ-neomycin cassette. This results in the conditional *Sh3bp4*<sup>fl/fl</sup> strain flanking exon 4. (B) RNAScope ISH showing efficient Cre-mediated *Sh3bp4* deletion in the intestine after tamoxifen induction. Scale bar, 100  $\mu$ m. (C-D) Representative image of RNAScope ISH of ISC marker, *Lgr5* (C) and *Olfrn4* (D), 3 months after *Sh3bp4* loss. (E-G) Tissues stained with H&E (E), periodic acid Schiff (PAS, goblet cells) (F), and chromogranin A (enteroendocrine cells) (G) showed no difference between wild-type and *Sh3bp4* cKO intestine. Scale bar, 100  $\mu$ m. (H) Immunofluorescent staining of EdU (green) and DAPI (blue). (I-K) Quantitation of EdU+ proliferating cells shows no differences in number of EdU+ cells per crypt (I), nor in the height of the proliferative zone (J), nor in the distribution of the proliferative cells along the crypt-villus axis (K). (L-M) H&E staining of wild-type and *Sh3bp4* cKO intestine in transversal (L) and frontal (M) intestinal sections showing more compact crypt-villus units in *Sh3bp4* cKO compared to wild-type. Scale bar, 1mm; inset 100  $\mu$ m. (N) Quantitation of number of crypts per circumference in the small intestine. Each dot represents the average number of crypts counted in 3 different transversal cuts of the jejunum per mouse. n=4 animals/group. \*\*P $\leq$ 0.01.

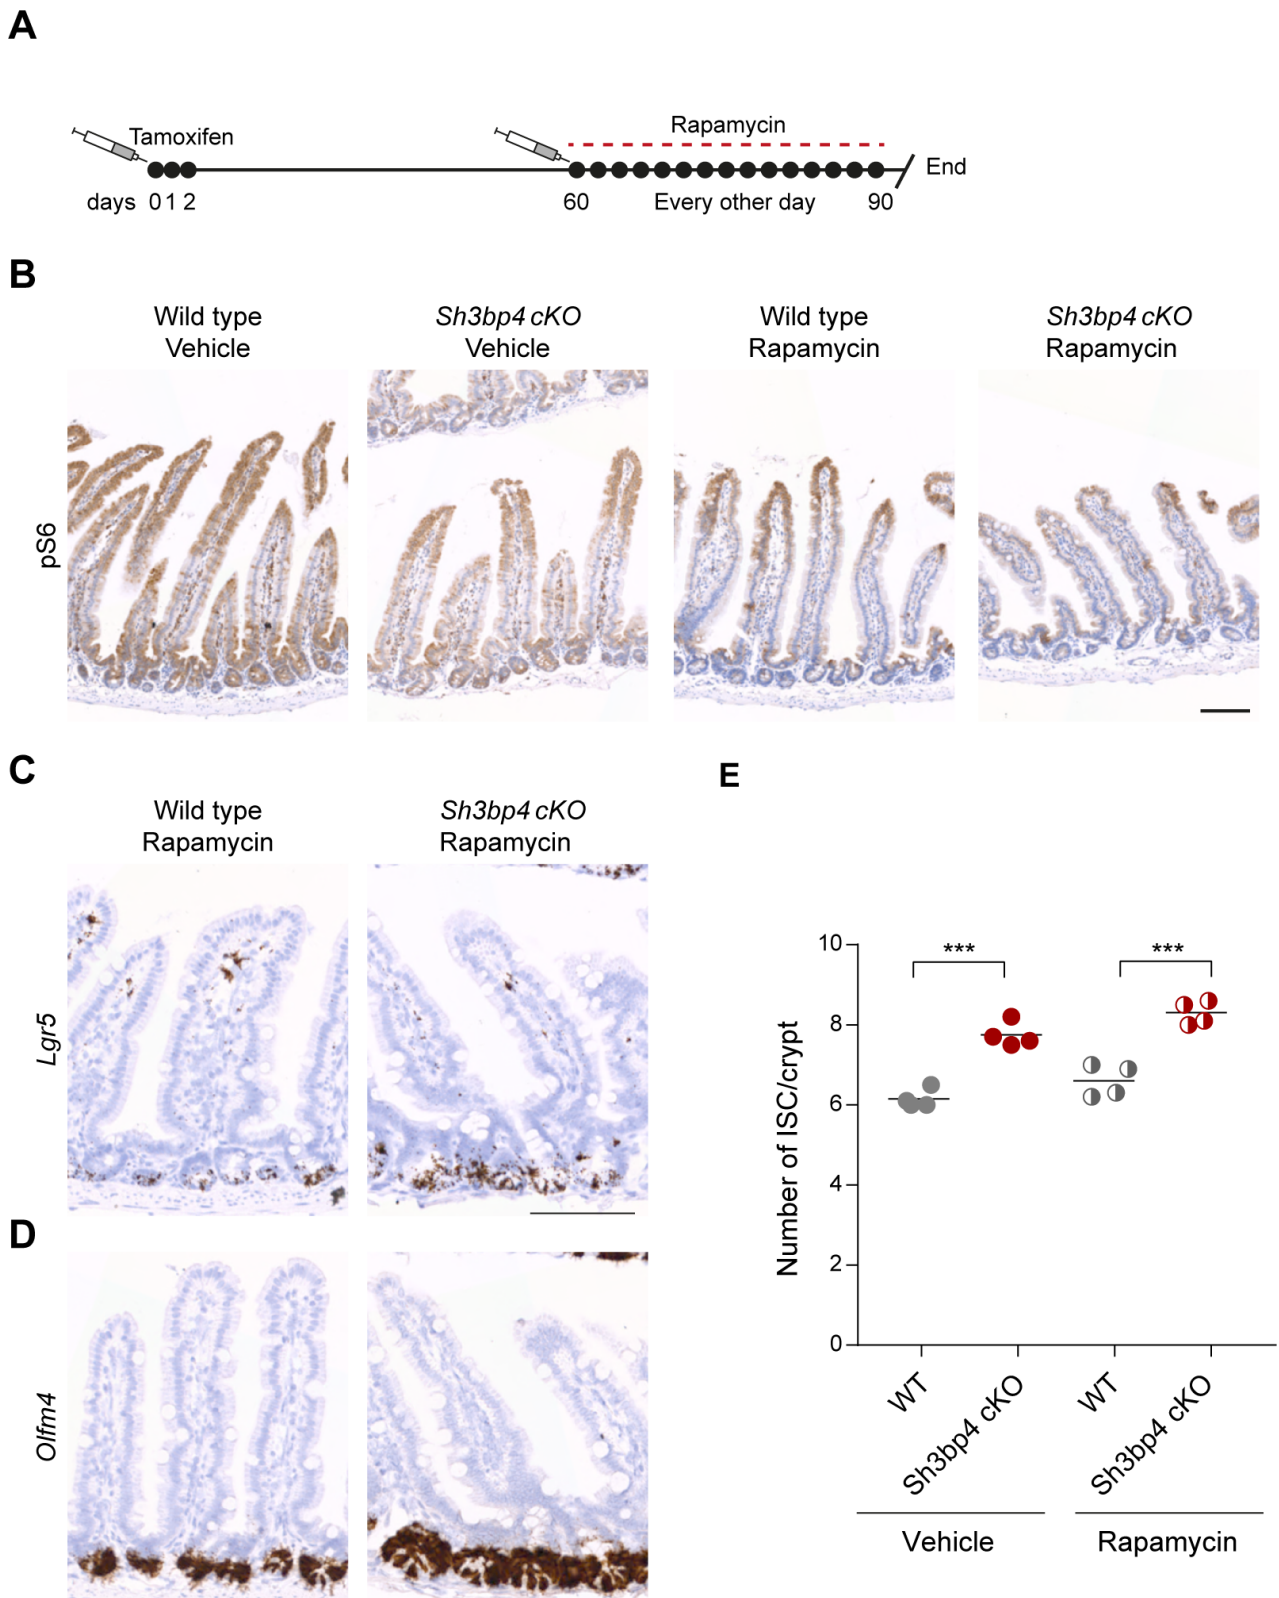

**Figure S3. Increased number of stem cells in *Sh3bp4* cKO mice is independent of mTOR pathway, Related to Figure 2.** (A) Schematic representation of rapamycin treatment strategy. *Sh3bp4* deletion was induced at 6 weeks-old by tamoxifen administration, and rapamycin treatment started 2 months after with intraperitoneal injections every other day for a month, after which mice were sampled. (B) Representative immunohistochemistry of phospho-RSP6 (pS6) showing reduction of RSP6 phosphorylation in animals treated with rapamycin for a month. (C-D) Representative images of RNAscope ISH of the ISC marker *Lgr5* (C) and *Olfm4* (D). Scale bar, 100 $\mu$ m. (E) Quantitation of number of *Olfm4*<sup>+</sup> ISCs per crypt shows that mTOR inhibition has no effect on the increased number of ISCs observed in *Sh3bp4* cKO compared to wild-type. Each dot represents the average number of *Olfm4*<sup>+</sup> cells per crypt per mouse (determined from at least 30 crypts analyzed). n=4 animals/group.

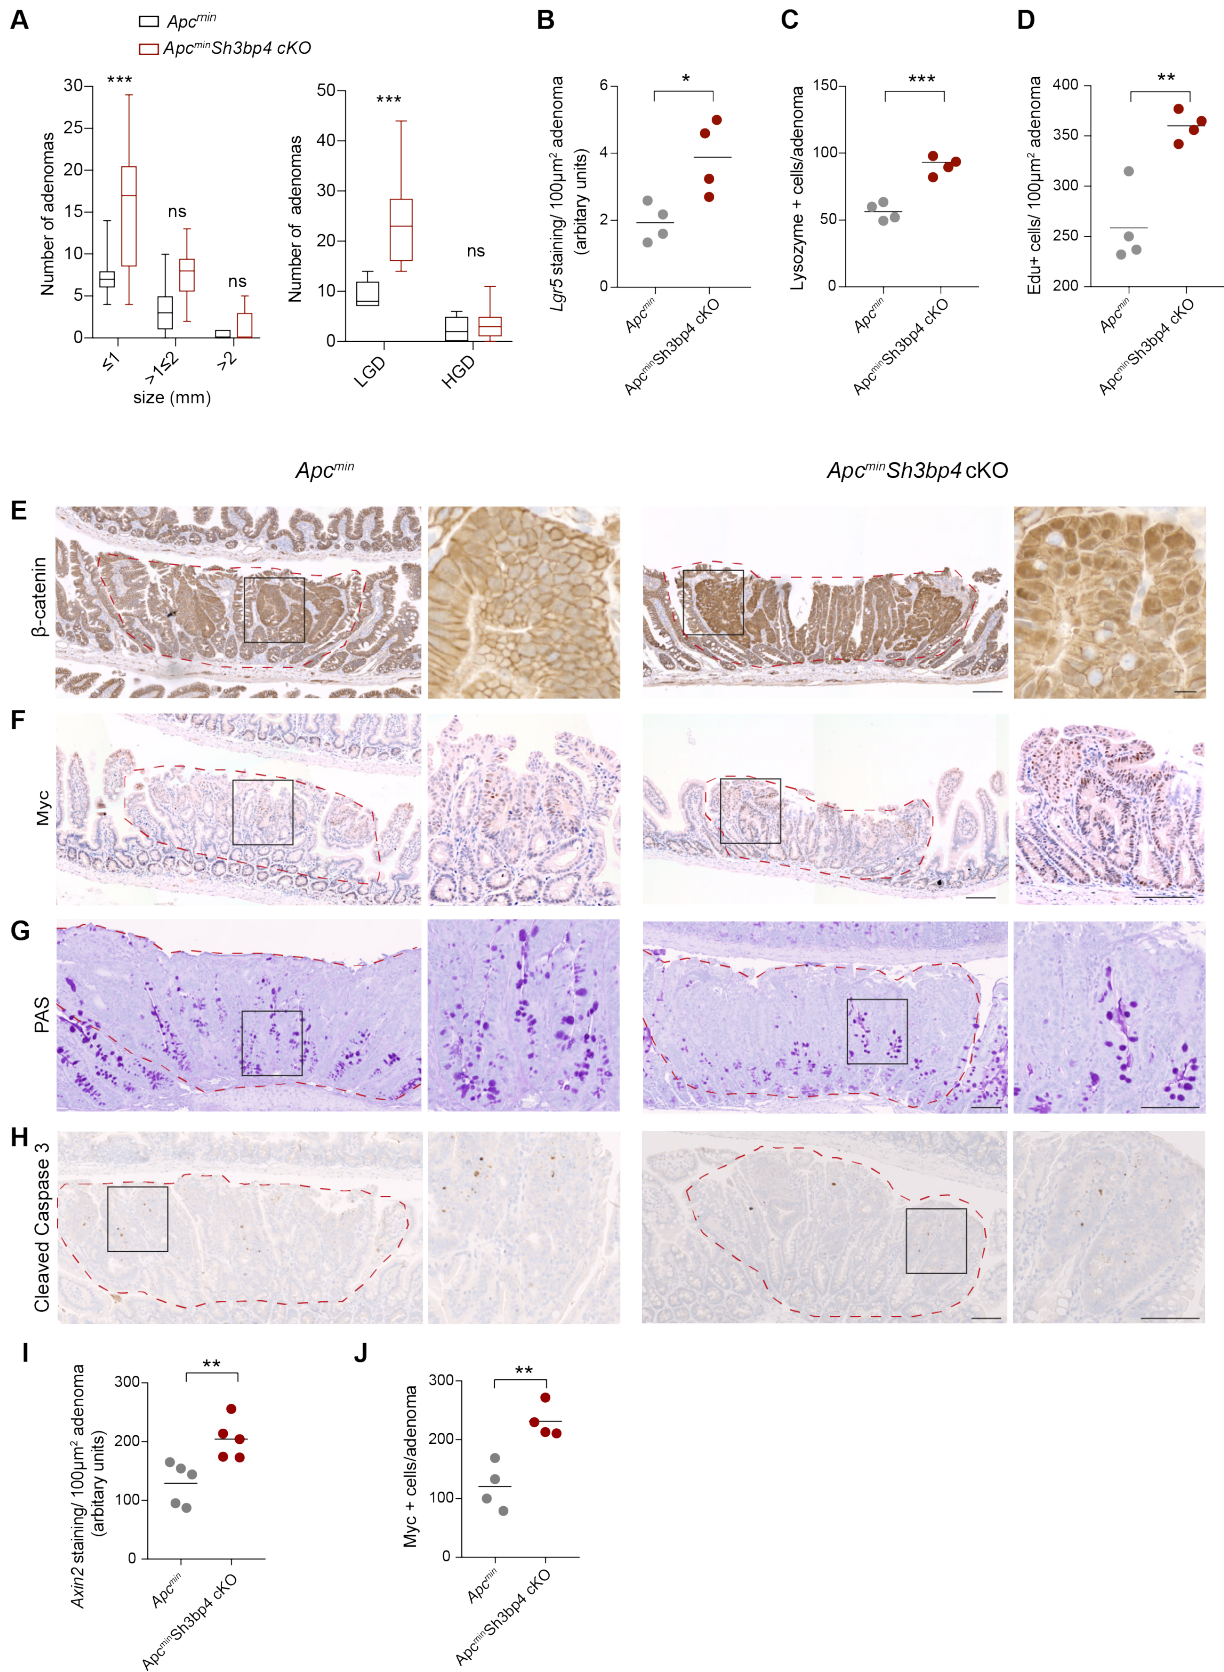

**Figure S4. Increased Wnt/ $\beta$ -catenin signaling and reduced differentiation in *Apc<sup>min</sup>Sh3bp4 cKO* adenomas, Related to Figure 3.** (A) Distribution of adenomas categorised based on size (left) and grade of dysplasia (right). LGD, low grade dysplasia; HGD, high grade dysplasia. The adenoma classification as LGD and HGD are detailed in the Methods section. Data are represented as mean  $\pm$  SD. \*\*\* $P \leq 0.001$ , ns, non-significant. (B) Quantification of *Lgr5* staining per 100 $\mu\text{m}^2$  adenoma in Figure 3D. (C) Quantification of Lysozyme<sup>+</sup> Paneth cells in Figure 3F. (D) Quantification of Edu<sup>+</sup> proliferative cells in *Apc<sup>min</sup>* and *Apc<sup>min</sup>Sh3bp4 cKO* adenomas in Figure 3G. Each dot represents the average of at least 5 adenomas (with similar size and grade of dysplasia) per animal. Black bar indicates the mean per group.  $n=4$  animals/group. \*\*\* $P \leq 0.001$ , \*\* $P \leq 0.01$ , \* $P \leq 0.05$ . (E-H) Immunohistochemistry staining of

$\beta$ -catenin (E), Myc (F), PAS (G) and cleaved-caspase 3 (H) in *Apc<sup>min</sup>* and *Apc<sup>min</sup>Sh3bp4* cKO intestine. Increased nuclear  $\beta$ -catenin and Myc expression is observed in *Apc<sup>min</sup>Sh3bp4* cKO adenomas compared to WT. Magnifications of the boxed area are shown. PAS staining shows reduced number of Goblet cells in adenomas with *Sh3bp4* deletion. Cleaved-caspase 3 staining show similar levels of apoptosis in *Apc<sup>min</sup>* and *Apc<sup>min</sup>Sh3bp4* cKO adenomas. Images are representative of at least 6 animals analyzed per group. Scale bar, 100 $\mu$ m. (I) Quantification of *Axin2* staining per 100 $\mu$ m<sup>2</sup> adenoma in Figure 3E. Each dot represents the average of at least 5 adenomas (with similar size and grade of dysplasia) per animal. Black bar indicates the mean per group. n=5 animals/group. (J) Quantification of Myc<sup>+</sup> cells in *Apc<sup>min</sup>* and *Apc<sup>min</sup>Sh3bp4* cKO adenomas in Figure S4F. Each dot represents the average of at least 5 adenomas (with similar size and grade of dysplasia) per animal. Black bar indicates the mean per group. n=4 animals/group. \*\*P $\leq$  0.01.

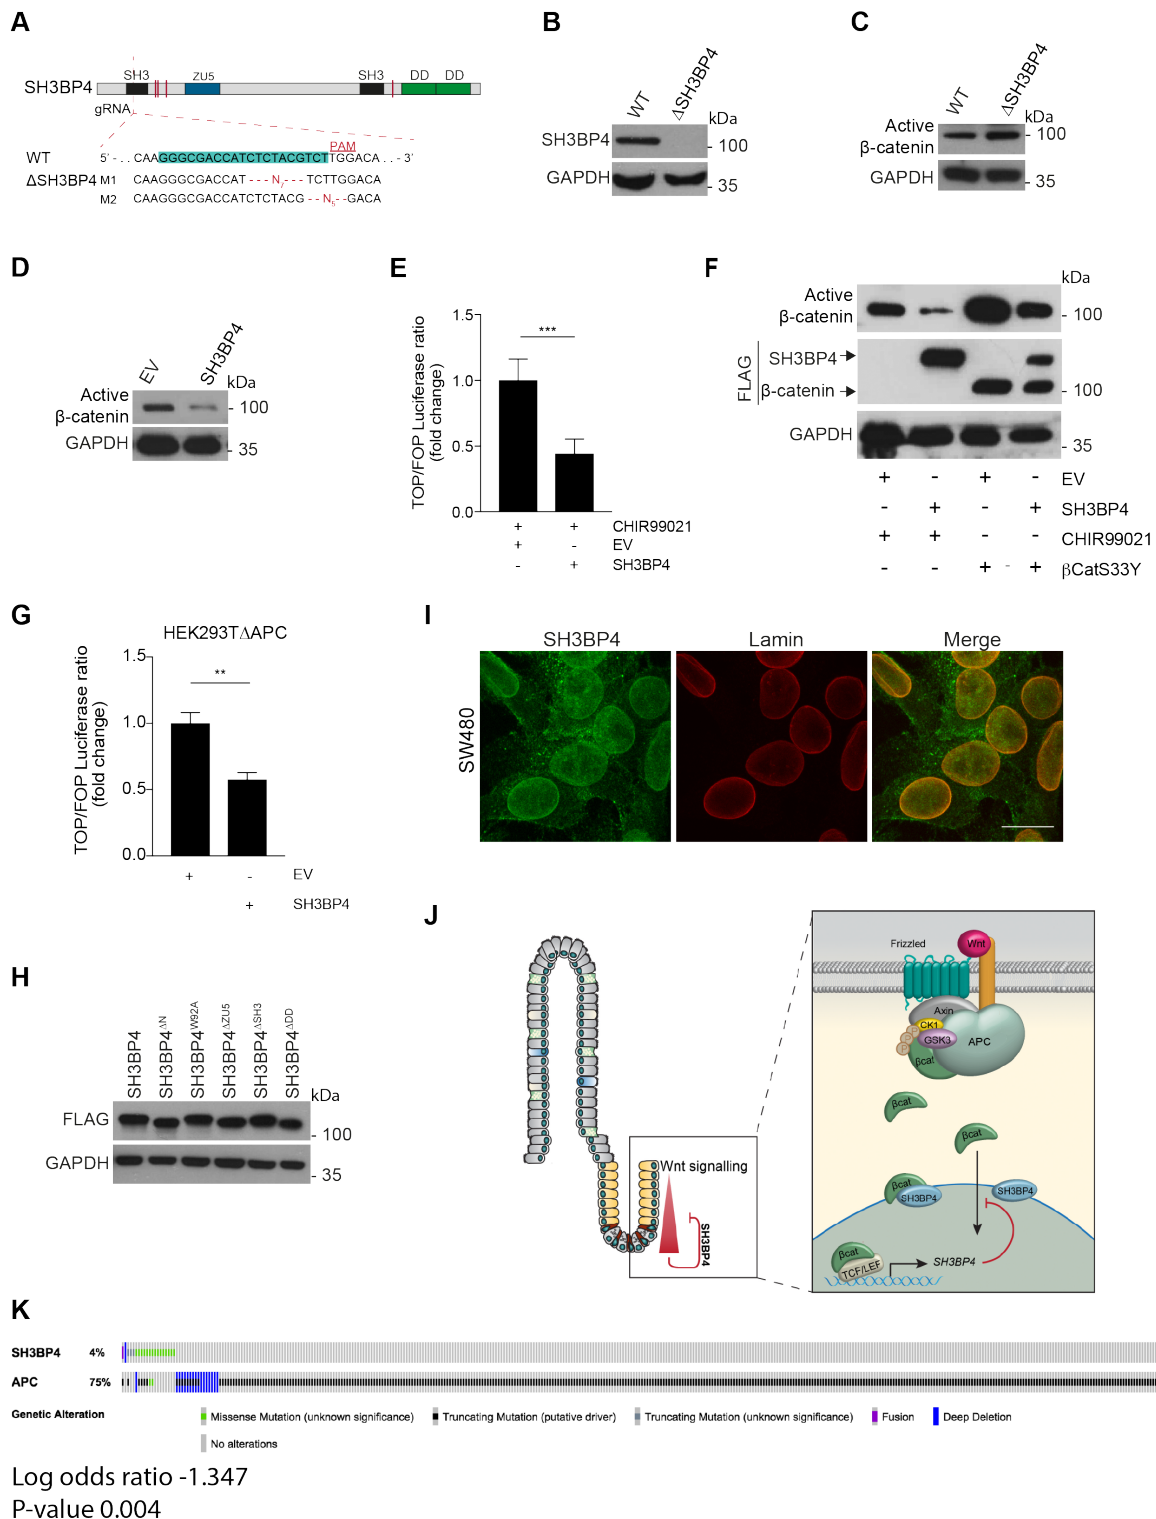

**Figure S5. SH3BP4 negatively regulates Wnt signaling, Related to Figure 4.** (A) Schematic representation of the CRISPR/Cas9 targeting strategy of *SH3BP4*. Genotyping of the selected  $\Delta$ SH3BP4 mutant clone reveals homozygous frameshift deletions on both alleles, indicated as M1 and M2. A 7bp- and a 5bp deletion were retrieved from the  $\Delta$ SH3BP4 clone, resulting in protein truncation at 110 and 89 amino acids respectively. (B) Immunoblot analysis showing protein loss in the  $\Delta$ SH3BP4 mutant clone. (C)  $\Delta$ SH3BP4 cells show increased levels of active- $\beta$ -catenin in Wnt3A-induced HEK293T cells when compared to wild-type. (D) Ectopic expression of SH3BP4 in HEK293T cells shows reduced levels of active- $\beta$ -catenin. (E) HEK293T cells overexpressing EV or SH3BP4 plasmids were treated with 2 $\mu$ M of GSK3 inhibitor CHIR99021 for 24 hours and relative TOPFlash reporter activity was measured. (F) Western blot shows that SH3BP4 reduces the active  $\beta$ -catenin levels induced by GSK3 inhibition (CHIR99021) and  $\beta$ -cateninS33Y expression. (G) SH3BP4 expression suppresses TOPFlash reporter activity induced by APC truncation (HEK293T  $\Delta$ APC) (Novellasademunt et al., 2017). (H) Western blot analysis showing similar protein expression level among different FLAG-tagged SH3BP4 WT and mutant constructs. (I) Immunofluorescence of SH3BP4 (green) and the perinuclear marker Laminin (red) in SW480 cells. Scale bar, 100  $\mu$ m. (J) Proposed model for the negative feedback

role of SH3BP4 in Wnt signaling. SH3BP4 is expressed at the Wnt-active stem cell compartment as a negative feedback mechanism to control Wnt/ $\beta$ -catenin signaling and maintain ISC homeostasis. SH3BP4 is present at the perinuclear membrane to restrict  $\beta$ -catenin nuclear translocation.



**Table S1. Primer sequences, Related to STAR Methods.**

| REAGENT or RESOURCE                                                                                                    | SOURCE     | IDENTIFIER |
|------------------------------------------------------------------------------------------------------------------------|------------|------------|
| Oligonucleotides                                                                                                       |            |            |
| <i>SH3BP4</i> , F: 5' gtcaaggtgtaggagagggagg 3', R: 5'ggcaaaggactcagaggaatg3'                                          | This paper | N/A        |
| <i>SH3BP4<sup>ΔN</sup></i> F: 5'gtggcggccgctcgaggccatgcccttgaactaccggaactcaacac3'; R: 5'ggcaaaggactcagaggaatg 3'       | This paper | N/A        |
| <i>SH3BP4<sup>ΔDD</sup></i> F:5' gtcaaggtgtaggagagggagg3' R:5' tcctttagtagtctcgagcctccagcagcaccgaggtgctca3';           | This paper | N/A        |
| <i>SH3BP4<sup>ΔSH3</sup></i> F: 5'gtgtccagcctcaagctggtggtcggcagggcccgg3' R: 5'cctgccgaccaccagttgaggctggacaccgggcccgg3' | This paper | N/A        |
| <i>SH3BP4<sup>ΔZU5</sup></i> F 5'cagaccaagccgtgcttttagcaaaagcacagtg3' R: 5'gcttttgctaaaaagcacggctgggtctggcccca3'       | This paper | N/A        |
| <i>SH3BP4<sup>W92A</sup></i> F: 5' cacatctggcggtagggcgtggtacgcacacaac 3', R: 5' gttgtgtgcgtaccacgcctcaccgccagatgtg     | This paper | N/A        |
| RT-qPCR <i>AXIN2</i> , F: 5' agtgtgaggtccacggaac3', R: 5' cttcacactgcatgcat 3'                                         | This paper | N/A        |
| RT-qPCR <i>MYC</i> F: 5'gtcgtagtcgaggtcatag3', R: 5' tctccttgacagctgcttag3'                                            | This paper | N/A        |
| RT-qPCR <i>CCND1</i> F: 5'aaatatcccacagggttcc3', R: 5'gtgttctctccgctgtaggc3'                                           | This paper | N/A        |
| RT-qPCR <i>Sh3bp4</i> F: 5'gtggcgtccgtcctagaaaa3', R: 5'gactcgtaggcgtccatctg3'                                         | This paper | N/A        |
| RT-qPCR <i>ACT1N</i> F: 5'gagcgcggctacagctt3', R: 5'tccttaatgcaccgacgatt3'                                             | This paper | N/A        |
| <i>SH3BP4</i> CRISPR/Cas9 gRNA: 5'ggcgaccatctctactct3'                                                                 | This paper | N/A        |
